# Supplementary material
Source: PubMed Central journal article supplement (PMC2937229)

**A**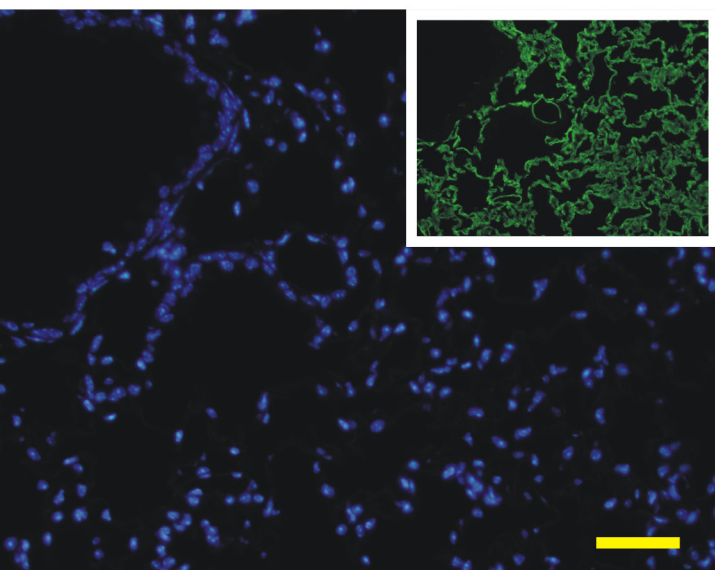**B**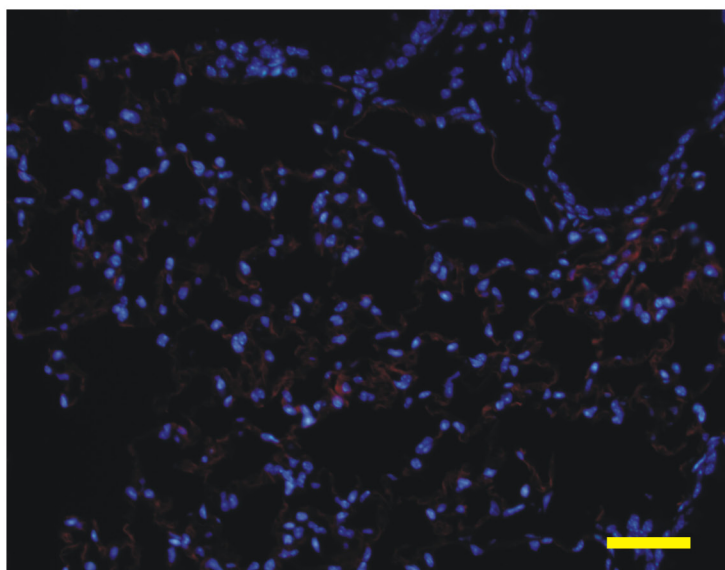**C**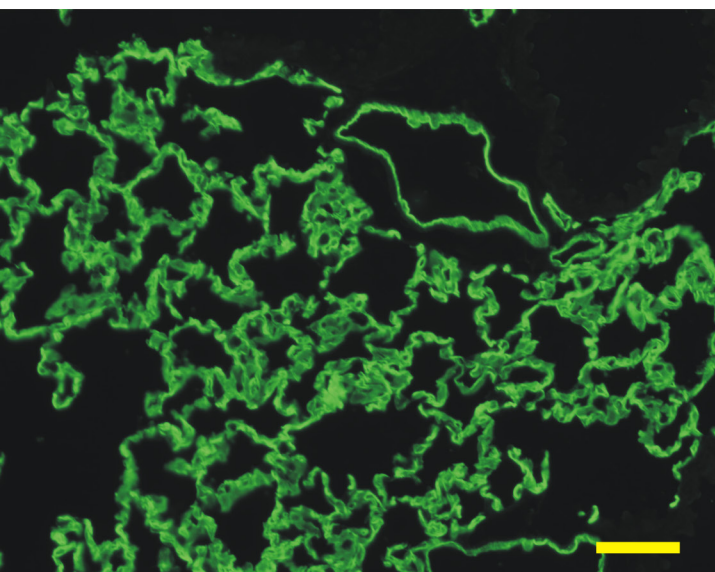**D**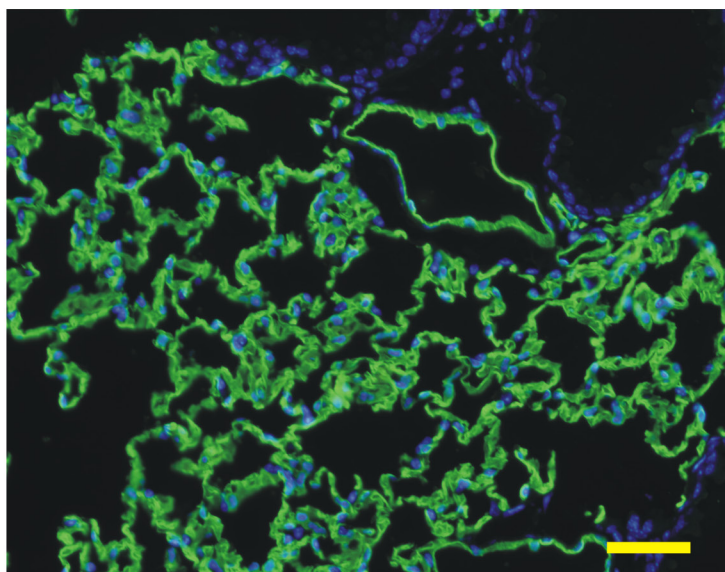**E**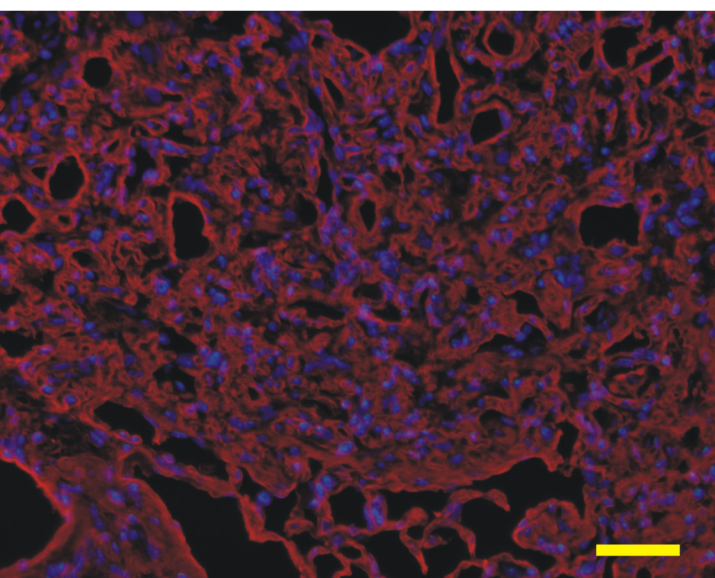**F**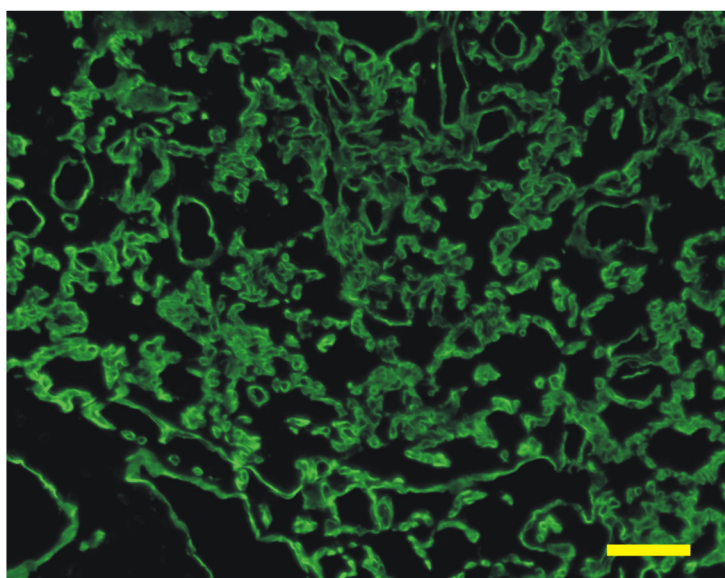

**A**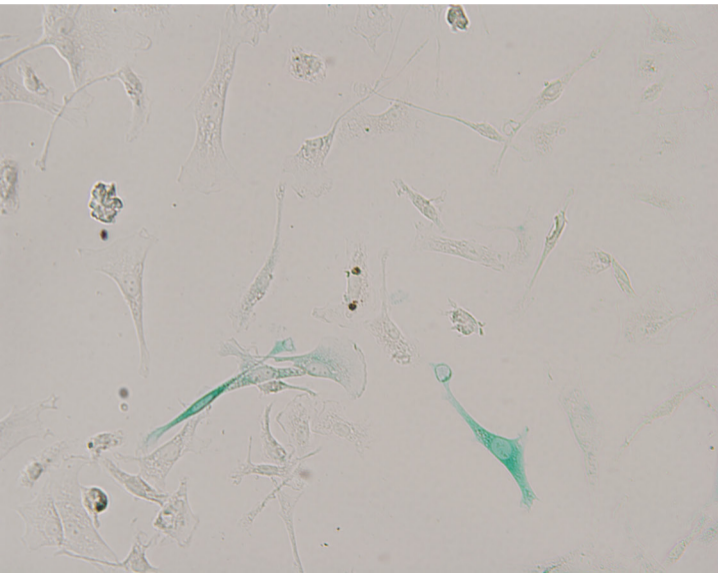**B**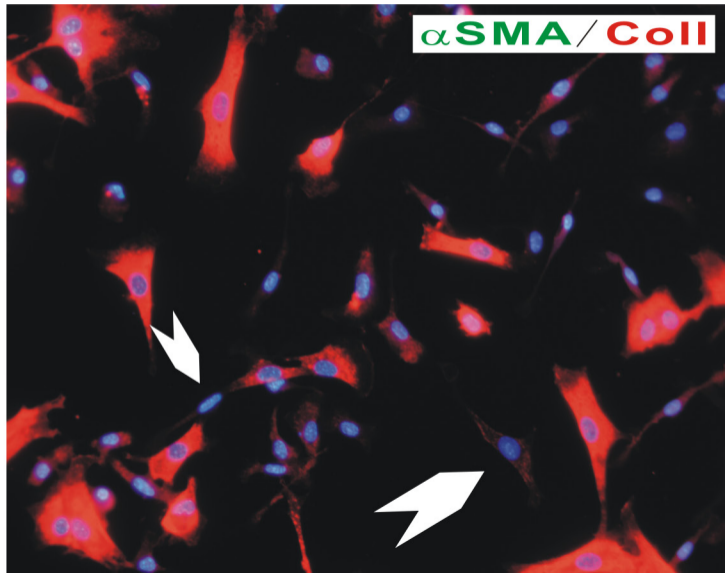

**A**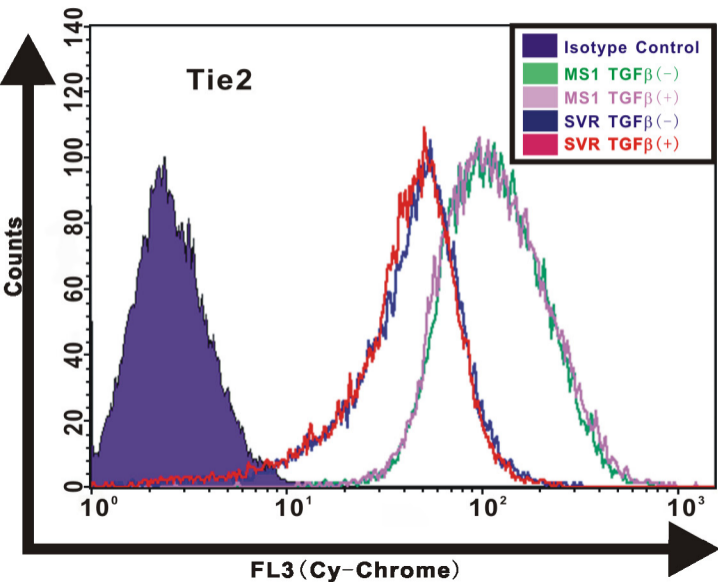**B**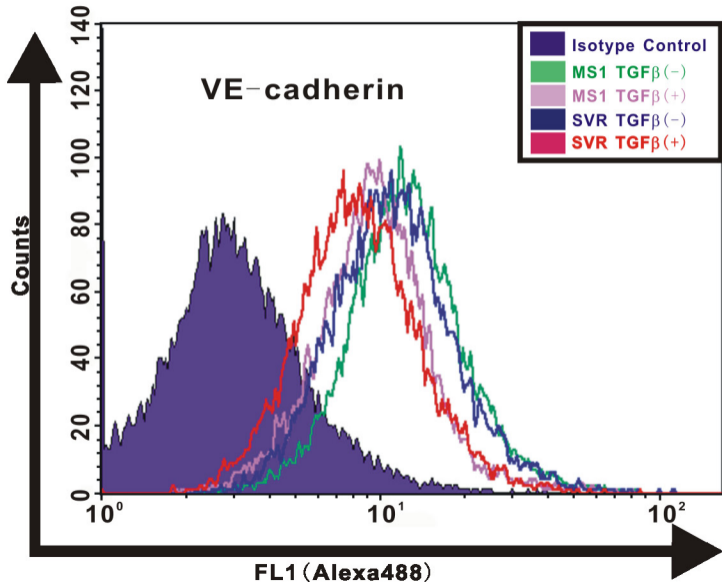

Supplement: supp_43_2_161__2.pdf [file supp_43_2_161__2.pdf]
